# Supplementary material for: Geo-historical analysis of flood impacts in Alpine catchments (HIFAVa database, Arve River, France, 1850–2015)
Source: Copernicus journal article supplement (doi:10.5194/nhess-2021-169), 2021-06-18
Supplement: Supplementary file [file nhess-2021-169-RC2-supplement.pdf]

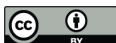

1           Geo-historical analysis of flood impacts in Alpine catchments  
2                   (HIFAVa database, Arve River, France, 1850 – 2015).

3  
4   Eva Boisson<sup>1</sup>, Bruno Wilhelm<sup>1</sup>, Emmanuel Garnier<sup>2</sup>, Alain Mélo<sup>3</sup>, Sandrine Anquetin<sup>1</sup>, Isabelle  
5   Ruin<sup>1</sup>.

6  
7   <sup>1</sup> University Grenoble Alpes, CNRS, Institut des Géosciences de l'Environnement (IGE),  
8   Grenoble, France.

9   <sup>2</sup> University Franche-Comté, CNRS, Laboratoire Chrono-environnement (LCE), Besançon,  
10   France.

11   <sup>3</sup> AXALP, Annecy, France; associate member at University Savoie Mont-Blanc, CNRS,  
12   EDYTEM - UMR 5204, Le Bourget du Lac, France.

13  
14   Correspondance to : Eva Boisson ([eva.boisson@univ-grenoble-alpes.fr](mailto:eva.boisson@univ-grenoble-alpes.fr))  
15

16  
17   **Abstract**

18   In France, flooding is the most common and damaging natural hazard. ~~Due to~~ global warming,  
19   ~~it is expected to globally exacerbate,~~ and it could be ~~even~~ more pronounced in the European  
20   Alps ~~that~~ warm at a rate twice as high in the Northern Hemisphere. The Alps are densely  
21   populated, increasing exposure and vulnerability to flood hazard. ~~To approach~~ long-term  
22   ~~evolutions of past~~ flood occurrence and related socio-economic impacts in relation to changes  
23   in the flood risk components (i.e. hazard, exposure and vulnerability), the study of historical  
24   records is highly relevant.

25   To this aim we analyze the newly constituted database of *Historical Impacts of Floods in the*  
26   *Arve Valley* (HIFAVa) located in French Northern Alps ~~and~~ starting in 1850. This database  
27   reports for the first-time flood occurrences and impacts in a well-documented Alpine catchment  
28   that encompasses both a hydrological and societal diversity.

29   We analyze past impacts in regard to their characteristics and evolution in both time and space.  
30   Our results show an increasing occurrence of impacts from 1920 onwards, which is more likely  
31   related to indirect source effect and/or increasing exposure of goods and people rather than  
32   hydrological changes. The analysis reveals that small mountain streams and particularly  
33   glacial streams caused more impacts (67%) than the main river. While ~~increase~~ in heavy  
34   rainfall and ice melt are expected to enhance flood hazard in small Alpine catchments, this  
35   finding calls ~~to pay a particular~~ attention to flood risk assessment and management in small  
36   catchments.  
37

38  
39   **Keywords** : flood risk, exposure, vulnerability, history, socio-economic impacts, French Alps.  
40  
41  
42  
43

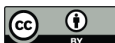

## 44 1. Introduction.

45

46 On the mainland French territory flood is the most common and damaging natural  
47 hazard in terms of economic cost and number of municipalities concerned (Ministère de la  
48 Transition écologique, 2020). In highland regions, these events can be caused, among others,  
49 by summer thunderstorms, rain on thaw saturated soils, rain on snow or glacial lake outburst  
50 (Merz and Blöschl, 2003). The topography induces flood events with highly contrasted  
51 dynamics; from sudden events with large sediment transport in the upstream small catchments  
52 to multi-day events flooding large parts of the valley floor. This diversity of hydrological  
53 dynamics adds to the complexity in flood risk management. Furthermore, climate change is  
54 expected to increase extreme precipitation (Min et al., 2011) that could in turn increase flooding  
55 (Gobiet et al., 2014; Blöschl et al., 2020). This is especially the case for the European Alps  
56 where an increase in summer heavy rainfalls (Giorgi et al., 2016; Ménégoz et al., 2020) may  
57 threaten densely populated mountainous valley especially ~~exposed and~~ vulnerable to climate  
58 extremes (IPCC, 2019). With its long history of flooding, the densely populated Arve valley  
59 located in the Northern French Alps is indeed prone to experience ~~the latter effects~~ of global  
60 warming in the future.

61 Historical records constitute a source of reliable data to characterize past hydrological  
62 events because they contribute to give a comprehensive representation of these events and  
63 of their changes over long time scales in spite of the lack of instrumental data (Garnier and  
64 Desarthe, 2013; Barriendos et al., 2014; Wetter, 2017; Wilhelm et al., 2019). Impacts are  
65 considered as all types of outcomes for humans, society and ecosystems occurring in the  
66 aftermath of a physical phenomenon (IPCC, 2012).

67 The historical analysis of past events is useful for the study of catastrophe as we can  
68 hypothesize that these remarkable events are etched in the community's memory  
69 (Papagiannaki et al., 2013). Indeed, it is because these events have impacted ~~the~~ society that  
70 they are recorded in the historical records, i.e. have left a "social signature". Those high impact  
71 events can come close to the notion of a catastrophe as they can lead to a societal upheaval  
72 (Soanes and Stevenson, 2009) sometimes deleterious but also beneficial (behavioral change  
73 promoting prevention) (Garnier, 2017). High impact events are by nature rare, often resulting  
74 in a lack of available data (e.g. description of the event, time, extent, damages caused etc.).  
75 However, historical ~~approach~~ allows a social and spatio-temporal contextualization of the data  
76 (Giacona et al., 2017), making the reconstruction (date, impacts) of major flood events possible  
77 (Barriendos et al., 2003, 2019) and attesting the social apprehension of the phenomenon (Gil-  
78 Guirado et al., 2016).

79 Numerous historical databases were built to document past flood occurrence and  
80 magnitude, such as the Prediflood database (Barriendos et al., 2014), and some, as the  
81 database from Thoumas (2019), allow to analyze the climatic fluctuations. In contrast to these  
82 latter databases focusing on hydrological events, some databases collected the  
83 socioeconomic impacts of floods such as the APAT database (Lastoria et al., 2006), the press  
84 database on natural hazards and climate change from Llasat et al. (2009), the database of  
85 high-impact weather events in Greece from Papagiannaki et al. (2013), the EUFF database  
86 (Petrucci et al., 2019) and the SMC-Flood database (Gil-Guirado et al., 2019). Some  
87 databases stand out as the participative flood database ORRION (Giacona et al., 2019) or the  
88 database built by the RISC-KIT project (Garnier et al., 2018) which aim to develop methods  
89 and management tools and discuss the trajectories of vulnerability.

90 Floods, as natural hazards, are physical phenomena naturally occurring and can, when  
91 certain conditions are met, cause harm to societies. They can be interpreted as a social  
92 construction (Beck, 1992) since exposure of human activities and social vulnerability play a  
93 large role in the severity of the impacts. Flood impacts databases, constituted from historical  
94 records, can be considered as the expression of society's concerns, risk perceptions (fear,

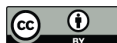

95 habit) and values (based on reported impacts). The recording of flood impacts, or the failure  
96 to record them, provides a subjective measure of the events that were considered worth  
97 reporting for various reasons across historical periods. Flood impacts result from the  
98 interaction between the natural phenomenon and the dynamics of exposure and vulnerability.  
99 As vulnerability we understand the inclination to damage of various exposed goods, activities  
100 or people constituting a given territory (Leone and Vinet, 2006). We consider the vulnerability  
101 as a dynamic system articulated to numerous physical and societal factors (Antoine, 2011).  
102 This system can evolve in time and space (Cutter, 2003). Major natural disasters, such as  
103 floods, are often displayed as unforeseeable events whereas the historical facts give evidence  
104 of the contrary (Garnier, 2016, 2019). Yet the society's vulnerability may increase as the past  
105 disasters are forgotten, leading to a "society of risk" (Garnier, 2019). Historical approach allows  
106 to explore the trajectories of hazard and vulnerability in response to changes in climate, land  
107 use and flood risk management (Gil-Guirado et al., 2016).

108

109 The present paper introduces a newly constituted database of flood impacts of the Arve  
110 River and its tributaries (Northern French Alps). The database called "*Historical Impacts of*  
111 *Floods in the Arve Valley*" (HIFAVa) covers all impacts caused by hydrological events that  
112 occurred since 1850.

113 The study of this database, the first one documenting a mountainous catchment, ultimately  
114 aims at analyzing the interactions between social and natural dynamics engendering flood  
115 impacts. In this paper we analyse the impacts with respect to their nature and evolution in both  
116 time and space.

117

118

## 119 2. Study area: the Arve River.

120

### 121 2.1. Description of the physical setting of the Arve River.

122 The Arve River is located in the Northern French Alps (Figure 1), flowing from the high  
123 elevations of the Mont-Blanc summit (4810m a.s.l.) to the Swiss lowlands (330m a.s.l.), where  
124 it flows into the Rhône River. The surface area of its catchment is 2164 km<sup>2</sup> with the largest  
125 part higher than 1000m a.s.l.. The main tributaries of the Arve River are the Giffre, the Borne,  
126 the Menoge and the Foron Rivers. Since 1850, the start date of the studied period, the  
127 Arve River is already almost completely embanked (Mougin, 1914; Gex, 1924; Peiry and  
128 Bravard, 1989).

129 Due to large difference of altitude between high and lowlands, the Arve flows can be defined  
130 by two hydrological regimes following an upstream to downstream continuum:

- 131 - The upstream part of the catchment (down to the city of Sallanches; Figure 1), has a  
132 glacio-nival regime due to the numerous glacial tributaries flowing from the Mont Blanc  
133 massif (Viani et al., 2018). Low flows occur in winter and early spring (December to  
134 March) and the high flows in summer (maximum in July and August) because of the  
135 strong contribution of ice melting (Bernard, 1900). Floods mainly occur in summer due  
136 to the synchronicity of both ice melt and intense subdaily rain storms. In this part of the  
137 catchment, the flood plain is narrow and the slope inclination is high.
- 138 - At lower elevations (i.e. downstream Sallanches) the regime becomes more and more  
139 nival downward. Low waters mainly occur in winter and reach the highest levels  
140 between late spring and early summer with the snowmelt. Between Sallanches and  
141 Bonneville, floods mainly occur in summer and autumn due to the conjunction of  
142 intense daily rain storm, snow melt and, in a lesser extent, ice melt contribution.  
143 Downstream Bonneville, floods occur at any time of the year due to even more various  
144 hydro-meteorological interplays. The valley floor is here wide and may be affected by  
145 extended flooding.

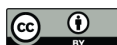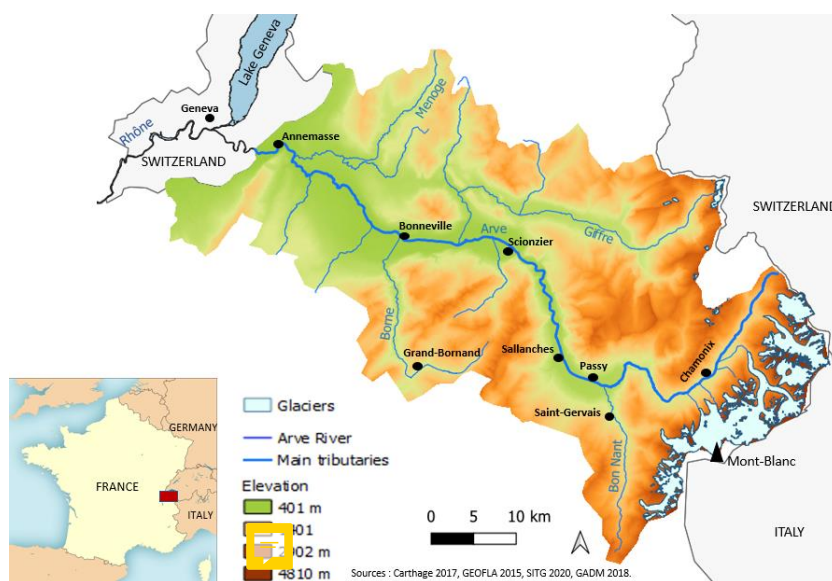

146

147

Figure 1. The Arve catchment with its location in the Northern French Alps, its topography, its main hydrological network and the main cities.

148

149

150

151

## 2.2. Socioeconomic setting and land use.

152

There are 106 municipalities located in the Arve catchment, globally facing a major population growth since 1850. For instance, the population has been multiplied by a factor of three in about 170 years at Chamonix (2 304 to 8 611 inhabitants between 1848 and 2016) and by a factor of thirty-four in Annemasse (1 047 to 35 712 inhabitants between 1848 and 2017) (INSEE, 2019). These numbers also hide large seasonal variations related to tourism activities. This is particularly the case in Chamonix where the number of residents increases up to ten times in high season. Most inhabitants live in the valley floor and the foothills that also welcome most of the farming, industrial and tourism activities as well as the main transportation routes and urban areas. Since 1965 and the opening of the Mont-Blanc Tunnel Highway the Arve valley is a major trans-Alpine route connecting France and Italy.

161

The socioeconomic setting of the valley follows an upstream-downstream distribution pattern. The period from 1850 to 1913 experienced a great touristic development (thermal bath of Saint-Gervais and mountaineering in Chamonix). The economy around Chamonix is essentially based on mountain tourism. In 1921, 250000 tourists were visiting Chamonix each year (Gex, 1924). In 2015 the lodging capacity in the valley reached around 416400 equivalent touristic beds. This part of the valley has undergone a rapid urbanization. In 1804, the discovery and exploitation of spring water for hydrotherapy in Saint-Gervais (Gex, 1924) fostered the construction of touristic accommodations. Around Bonneville, the valley is a densely populated corridor characterized by an old bar turning industry, born from the watch manufacture and nearby hydropower resources. The small valleys of the Arve tributaries are sparsely populated and the economy is based on tourism and farming. Due to the attractiveness of the city of Geneva, the valley from Bonneville to the Rhône River confluence is characterized from the 1960's by a major population growth, extended industrial areas and strong urbanization. Between the town of Cluses and Geneva the valley floor is almost continuously built-up.

176

177



178  
179  
180  
181  
182  
183  
184  
185  
186  
187  
188  
189  
190  
191  
192  
193  
194  
195  
196  
197  
198  
199  
200  
201  
202  
203  
204  
205  
206  
207  
208  
209  
210  
211  
212  
213  
214  
215  
216  
217  
218  
219  
220  
221  
222  
223  
224  
225  
226  
227

### 3. Material and methods of the HIFAVa database.

#### 3.1. Collecting data from historical archives.

A first historical study ~~has been carried out to draw a flood chronicle of the~~ Arve valley between the 18<sup>th</sup> and the 21<sup>th</sup> century, with a particular focus on the hydro-meteorological circumstances of the flood events (Mélo et al., 2015). As sources are more abundant over the last 165 years (1850-2015), this period was defined as the studied time frame of the HIFAVa database. Only events mentioned in at least two sources were integrated in the database. Since 2015, data have been further collected to complete the preliminary dataset from Mélo et al. (2015).

Information on floods and related impacts has been collected from various sources. Primary sources range from handwritten archives like municipal acts to departmental archives (e.g. reports of the *Préfecture* and of town councils). Secondary and tertiary sources are respectively made of published documents (newspapers, reports, books) and pre-existing databases. The database of historical records providing a chronological and synthetic layout of the data is composed of (Table A1):

##### Manuscript materials:

- Most of the manuscripts are kept in the departemental archives (*Archives Départementales de Haute-Savoie*: ADHS) (Conseil départemental de la Haute-Savoie, n.d.) or in the municipal archives (*Archives municipales*: AM) of the towns of Chamonix, Cluses and Bonneville. The departmental and municipal archives also contain records older than the Savoy annexation by France in 1860. The records can be private or from a public institution.

##### Printed materials:

- Articles of scientific journal and books used in this study have been published since 1914. They mostly correspond to analyses of the regional hydrology (Mougin, 1914; Rousset-Mestrallet, 1986) but ~~they can~~ also focus on single hydrological events (Pardé 1931; Rougier 2002; Goy 2002) and risk assessment (Douvinet et al., 2011).
- Open-access online municipal risk prevention plans (*Plan de Prévention des Risques*: PPR; and *Plan de Prévention du Risque Inondation*: PPRi) (Préfecture de la Haute-Savoie, n.d.) as preventive regulatory documents used to delineate risk areas, often compile historical flood events that affected municipalities.

##### Newspapers:

- Most of the newspapers used are regional, but one is published at national level (*Le Figaro*) and another is printed in Geneva, Switzerland (*Le Journal de Genève*). Most of the newspapers can be found online or are kept in the departmental or municipal archives. Newspapers describe the causes and consequences of the event and sometimes provide instrumental data and illustrations. They also ~~inform about~~ the public authority response and ~~the past ongoing~~ discussion.

##### Other records:

- The national database of historical flooding (*Base de Données Historiques sur les Inondations*: BDHI) ~~that~~ gathers floods events considered as “remarkable” in the French territory (Ministère de la Transition Ecologique, n.d.; Boudou, 2015) has been used.
- The database created by the department of Restoration of Mountainous Areas (*Restauration des Terrains en Montagne*: RTM) from the public institution managing the French public forests (*Office National des Forêts*: ONF). The ONF-RTM database gathers transcriptions of observations of the RTM officials as well as information collected from diverse primary sources. These data (labelled RTM in the HIFAVa

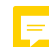





228 database) are freely available through the open-access and online ONF-RTM database  
229 (RTM and ONF, 2012). Some specific ONF-RTM reports are also included in the  
230 HIFAVa. The RTM database was built to assist the management of small tributaries.  
231 - A movie realized in 1990 by the RTM is also mentioned as a source.  
232 - Some records are from the *Syndicat Mixte d'Aménagement de l'Arve et de ses*  
233 *Affluents* (SM3A), which is the institution in charge of the management of the Arve River  
234 and its tributaries since 1994.

### 235 236 **3.2. Characteristics of the HIFAVa database.**

237 The database has been built using the free and open-source relational database  
238 management system PostgreSQL and is accessible through its package pgAdmin.  
239 HIFAVa contains 916 distinct flood impacts caused by 321 flood events. The primary key is  
240 the impact ID. Therefore, each impact is recorded as a unique line and described through  
241 various variables (Table 1 and Table A2). The river that triggered the flood is mentioned when  
242 possible (94% of cases). For instance, no river name has been attributed to the impacts related  
243 to overland flow in January 1979. The accuracy of the impact location varies from specific  
244 addresses (house, bridge, neighborhood) to the municipality scale. When the source is not  
245 accurate enough to distinguish distinct locations of several impacts, they are all referenced  
246 under a unique impact ID. In other words, sometimes an event caused numerous impacts  
247 registered under distinct ID because it was possible to localize each impact precisely (at the  
248 hamlet scale) and sometimes we can only localize the impacts at the municipality scale so they  
249 are register under the same ID. The severity of an event can not be estimate by the number of  
250 ID registered in the database. The most recent sources are often highly informative, allowing  
251 impacts to be more precisely located.

252 **Impacts** occurring the same day on a given river are expected to be caused by the  
253 same flood event. As a result, the date is the key used to connect each impact to a flood event.  
254 This "flood event" definition has been extrapolated to impacts occurring the same day in  
255 different catchments, assuming that two impacts occurring the same day can be caused by the  
256 same hydrometeorological event given the moderate surface area of the Arve catchment. The  
257 accuracy of the date is rated on a certainty scale (hour, day, month, year). Based on  
258 information contained in the records, we distinguish when possible the hydrometeorological  
259 events (e.g. rainfall, intense and short rainfall, melting of snow, frozen soil, glacial outburst,  
260 wet period before the event) which caused the flood and the different flood types (e.g. river  
261 flooding, overland flow, sediment transport) leading to the impacts.

### 262 263 **3.3. Text mining.**

264 The flood impacts of the HIFAVa were categorized through a text quantitative content  
265 analysis with the KH Coder software (Higuchi, 2015). The description of the impacts comes  
266 from comments contained in the records. The most frequent words have been gathered in  
267 order to determine representative categories of the database content. A category is made of  
268 several words assigned to a coding rule. Categories have been inspired by the flash flood  
269 impact severity scale of Diakakis (2020). This analysis has led to the following seven  
270 categories with example of the assigned words:

- 271 - Transport network: e.g. "road", "bridge", "railway", "street".
- 272 - Urbanized areas and residential buildings: e.g. "house", "town", "basement".
- 273 - Natural environment: e.g. "forest", "field", "yield", "sediment transport".
- 274 - Protection infrastructures and dams: "dikes" and "dam".
- 275 - Industrial, commercial and recreational facilities: e.g. "mill", "factories", "golf",  
276 "camping", "hotel", "school".
- 277 - Critical installations: "drain", "power transformer".
- 278 - Victims: "dead", "injured", "missing", "evacuee".



279  
 280  
 281  
 282  
 283  
 284

A more in-depth analysis will be conducted later on to define severity classes based on the nature of the impacts. This future analysis will be based on the work of Barriendos et al., (2003), Llasat et al (2005, 2013) and Boudou et al. (2015).

| ID  | Event | Sources                                                                   | Start_day | Start_month | Start_year |
|-----|-------|---------------------------------------------------------------------------|-----------|-------------|------------|
| 140 | 58    | Payot 1951 / Goy 2002 / RTM / BDHI                                        | 12        | 7           | 1892       |
| 670 | 263   | RTM / Dauphiné libéré : 26/07/1996, 27/07/1996, 30/07/1996 and 02/08/1996 | 24        | 7           | 1996       |

  

| Start_date | Time_unc | Hour  | River    | Impacts               | Municipality            |
|------------|----------|-------|----------|-----------------------|-------------------------|
| 12/07/1892 | D        |       | Bon Nant | Thermal Bath, victims | Saint-Gervais-les-Bains |
| 24/07/1996 | H        | 11 pm | Arve     | City center           | Chamonix-Mont-Blanc     |

  

| Impact_latitude | Impact_longitude | Space_unc | Count | Hydrometeo_descript | Water_level |
|-----------------|------------------|-----------|-------|---------------------|-------------|
| 45.8965         | 6.70596          | A         | 175   | No entry            |             |
| 45.9257         | 6.87057          | A         | 0     | No entry            | 0,4m        |

  

| Flood_description                                                                    | Impacts_decription                                                                                |
|--------------------------------------------------------------------------------------|---------------------------------------------------------------------------------------------------|
| Debris flow. 30 minutes to flow from the Tête Rousse glacier to the Arve confluence. | More than 175 victims, destruction of most of Thermal Bath, mud over the first floor.             |
| Debris flow, logjam under bridges.                                                   | Numerous houses and the city center are under water. Fuel oil pollution due to basement flooding. |

285  
 286  
 287  
 288  
 289  
 290  
 291  
 292  
 293  
 294  
 295  
 296  
 297  
 298

Table 1. Extract of the HIFAVa database showing its structure. Refer to the Online Resource 2 for details about the column contents.

## 4. Results and discussion.

### 4.1. Evolving sources over time.

During the studied period, the diversity and the quantity of sources in which mentions of impacts have been found fluctuate (Figure 2). Among the existing databases used, the BDHI database for instance continuously covers the studied period but was sporadically informative since it only contains two mentions of flood impacts in the Arve catchment, respectively in 1892 and in 1987. By contrast, the SM3A database appears later (1979) in the studied time frame.

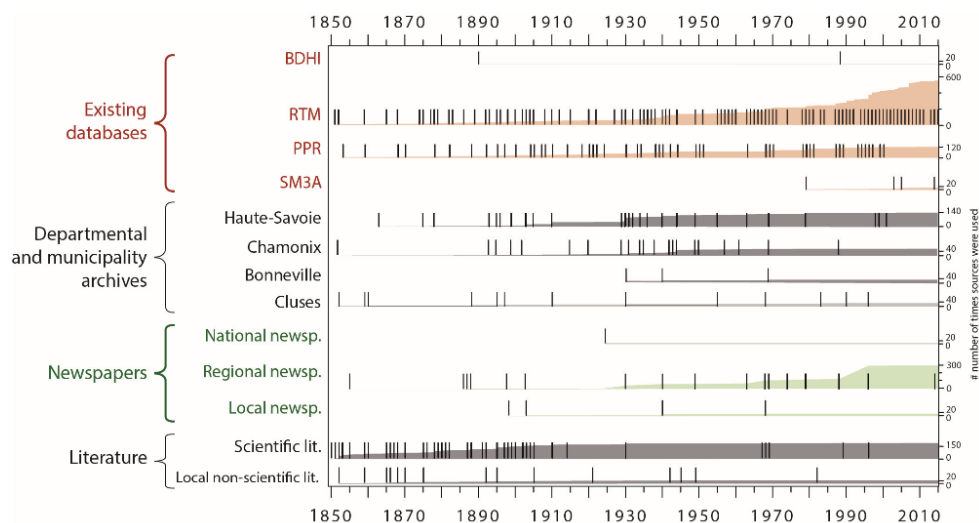

Figure 2. Number and diversity of studied sources to document flood impacts.

299

300

301

302

303

304

305

306

307

308

309

310

311

312

313

314

315

316

317

318

319

#### 4.2. Changes in impacts over time and space.

320

321

322

323

324

325

326

327

328

329

330

331

From 1850 to 1920, the number of impacts fluctuates and only four years are remarkable with more than 15 impacts (1852, 1878, 1895 and 1910). From 1920, years with such a large number of impacts become more frequent (1930, 1940, 1944, 1968, 1979, 1987, 1990, 1996, 1997 and 2007) and the total amount of impacts per year reaches 54 in 1996 (Figure 3). The decennial moving average of the impacts' number highlights an overall increase over the 165 years, punctuated by periods with less frequent impacts (in 1910-1923, 1950-1960 and 1975-1980). Besides, the number of recorded flood events stays relatively stable between 1.5 and 3 events per year on average until 1990, then it rises up to 4.5 events per year. Therefore, the overall increase in recorded impacts seems partly disconnected to changes in flood occurrence. Only the latest period (1990-2015) of increasing impacts may be partially due to a rise in flood occurrence. In particular, the increase in flood impacts starting in the 1920's and well-marked





332 since the 1960's, especially by repeated years with very high numbers of impacts, may be  
333 explained by other processes as discussed in the next section.  
334

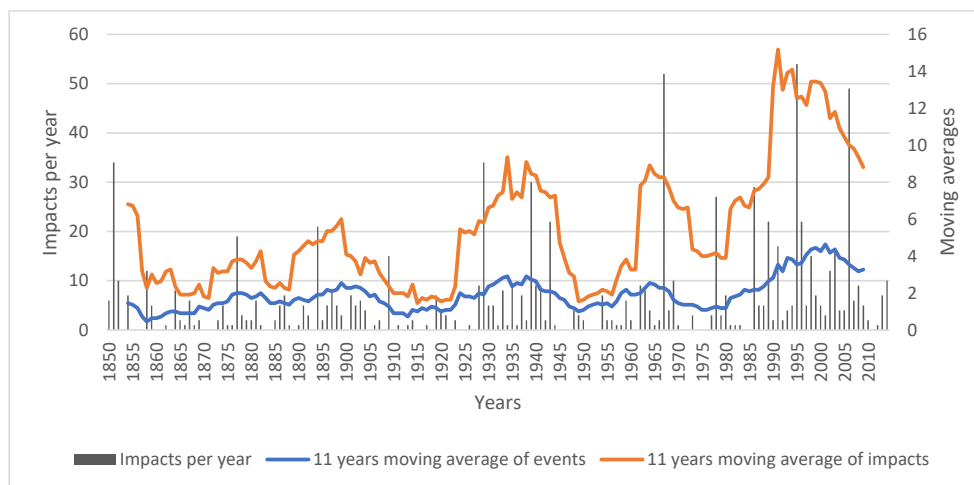

335  
336 **Figure 3. Occurrence of impacts and moving averages of impacts and associated flood events**

337  
338 When analyzing the spatial distribution of the flood impacts, we can see that they are  
339 spread over the entire catchment (Figure 4). They are, however, mainly gathered in the Arve  
340 valley around Chamonix and Bonneville (24 and 12,5% of total impacts recorded in the Arve  
341 catchment). These high numbers may be due to the fact that these towns are both among the  
342 most densely populated and the closest towns to the Arve River. The impacts caused by the  
343 Arve River floods represent 33% of all recorded impacts, and its two main tributaries, the Giffre  
344 and the Borne Rivers, have only caused 8% of the recorded impacts. In fact, most impacts are  
345 due to small torrential streams (53%). Among them, almost a third is related to glacial  
346 tributaries, while these tributaries are localized only in the uppermost part of the catchment  
347 near Chamonix. For instance, small torrential tributaries such as the Arveyron, the Grépon (left  
348 bank tributary close to Chamonix) or the Bon Nant have caused alone more impacts than the  
349 Borne River itself.



350

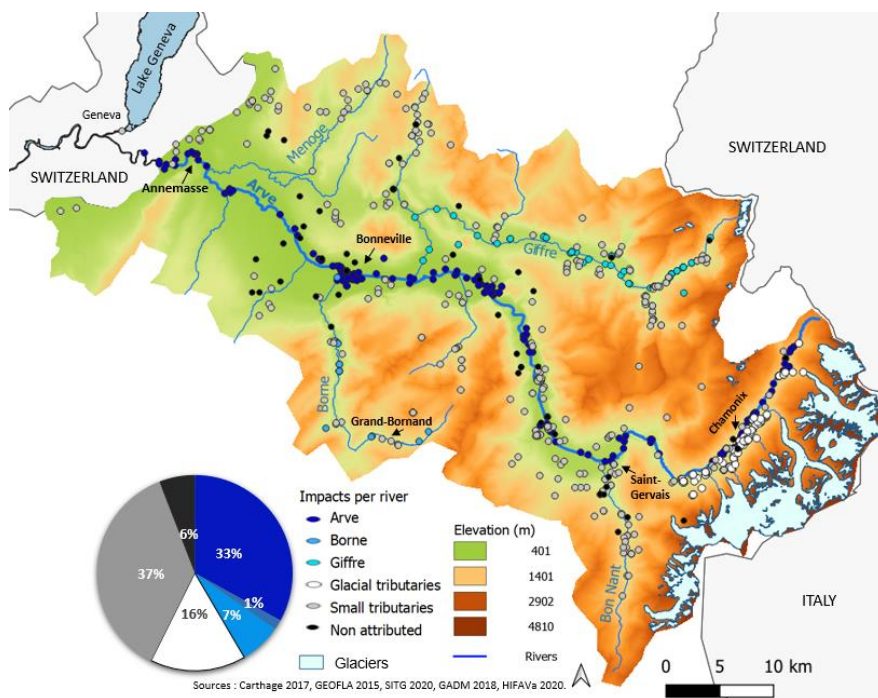

351

352 Figure 4. Location and distribution of flood impacts caused by the Arve and its tributaries. The  
353 category “non attributed” corresponds to the part of impacts for which it was not possible to  
354 attribute a river, either because events are related to overland flows or because of the location  
355 between two or more rivers.

356

357 The Arve tributaries produced disasters characterized by numerous and major flood damage.  
358 Among them, the 1987 Borne River flooding in its uppermost part washed away the municipal  
359 campsite of the village of the Grand-Bornand causing 23 casualties and heavy economic  
360 losses (Meunier, 1990). In addition, the 1892 glacial lake outburst from the Tête Rousse glacier  
361 in the Bon Nant River (which literally translated means “Good Stream”) swept away the thermal  
362 bath of Saint-Gervais (Figure A1) and 33 houses causing at least 175 casualties. The glacier  
363 was drained in 2010 and is today closely monitored to avoid such a brutal and disastrous  
364 natural event (Garambois et al., 2016).

365 All these high impacts events are due to sudden, highly-dynamic summer floods of tributaries,  
366 often aggravated by large sediment transport. Some towns located along the Arve River – such  
367 as Sallanches – are more prone to tributary’s floods because embankments have been built  
368 and efficiently prevent impacts from the Arve flooding. In contrast, there are very few impacts  
369 recorded in high altitude, probably due to the sparse human settlements.

370

### 371 4.3. Potential drivers of changes in the number and spatial distribution 372 of impacts.

373 The increase in the number of impacts starting in the 1920’s and well-marked from the  
374 1960’s can be explained by multiple factors, such as indirect source effect, increasing flood  
375 activity and/or increasing exposure of goods and people. However, the flood occurrence did  
376 not change significantly before the 1990’s (Figure 3). Therefore, the increase in impacts cannot  
377 be explained by changes in flood occurrence, at least prior to 1990.



378 To decipher the potential source effect in the increase in impacts since 1960, maps of  
379 the impacts by sources have been drawn for the periods before and after 1960 (Figure 5). For  
380 the first period (1850-1959), three main sources describe 64% of the impacts (literary records  
381 28%, RTM 18% and departmental and municipal archives 18%) and for 29% the information  
382 comes from more than one source. The impacts are mainly gathered along the Arve and the  
383 Giffre Rivers, especially in the valley of Chamonix and between the towns of Cluses and  
384 Bonneville.  
385 For the second period (1960-2015), the RTM reports 65% of the impacts, and 20% come from  
386 multiple sources while departmental and municipal archives and the PPR/PPRI describe 5%  
387 each. Information coming only from literature decreases substantially (122 described impacts  
388 in the first period to 3 impacts in the second), SM3A records start in 1979 and only document  
389 the Giffre and the Bon Nant Rivers. The distribution of the impacts is much more scattered  
390 across the whole catchment than during the first period. The impacts are not anymore gathered  
391 along the Arve River, since most of them result from small tributaries. Impacts described by  
392 more than one source are located in the valley of Chamonix and around Bonneville, probably  
393 because these economic and touristic centers arouse interest of many sources (newspapers,  
394 departmental and municipal archives and RTM). The touristic specificity of valley and its  
395 international stature can explain the media coverage. We can assume that, floods are more  
396 likely to be reported in newspapers as when they happen in a location known by the reader. In  
397 addition, the strong emergence of the RTM since 1940 (Figure 2) can explain the rise in  
398 impacts caused by small tributaries, illustrates by the Figure 5. Following the floods of the  
399 Rhône, the Loire and the Garonne in 1854, the 1858 law against urban flooding places flood  
400 control at the heart of the national legislation for the first time. In the following, the RTM  
401 department was formed for the reforestation of mountains slope in order to prevent the  
402 reproduction of major floods. The department became quickly efficient and since 1860  
403 collected numerous reports. Built for the study and management of small tributaries, the RTM  
404 database became the main source of information since 1930 for the HIFAVa database.  
405

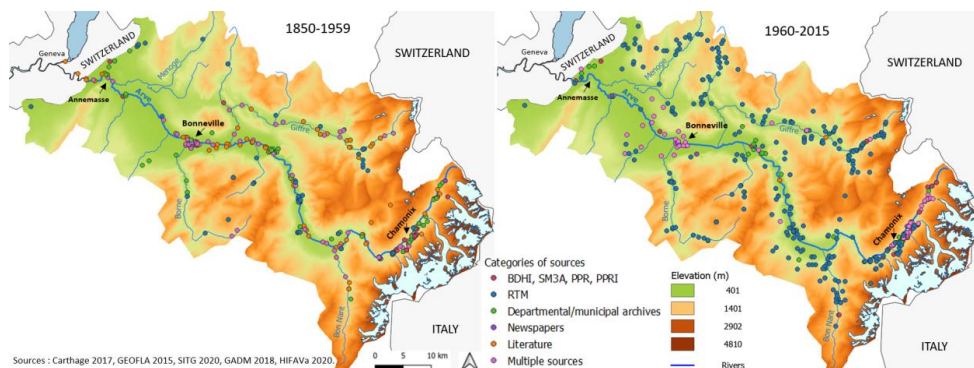

406 Sources : Carthage 2017, GEOFLA 2015, SITG 2020, GADM 2018, HIFAVa 2020  
407 Figure 5. Distribution of the sources describing the recorded flood impacts in the Ave  
408 catchment during two periods: 1850-1959 and 1960-2015.  
409

410 The rise in the number of impacts per flood may be partly explained by the fact that distinct  
411 impact types in the same location were reported and therefore referenced under distinct impact  
412 ID, while they were not differentiated in previous periods. Recent sources seem to provide more  
413 accurate information on the impacts and their location. In older sources, impacts are most of  
414 the time documented at the city scale (21% of the impacts for the first period, and 10% for the  
415 second period). Thereby, all these impacts are stored in the database in a single line with an  
416 uncertainty code for the impact location corresponding to the municipal level. In most recent



417 sources, impacts' locations are described more accurately allowing to record them at a  
418 resolution up to the building scale. As a result, impacts are stored in as many lines as impacts  
419 locations can be identified, with an uncertainty code for the impact's location corresponding to  
420 the building or neighborhood level (85% of the impacts for the second period). For example, in  
421 1996 fifty-three impacts were recorded for a same event and fifty of them were located in  
422 distinct places in Chamonix. The rise in impacts can also be due to numerous impacts in  
423 different locations, as the flood of 1990 which impacted six towns in two different sub-  
424 catchments (the Arve and the Giffre catchments). However, in order to overcome the bias  
425 induced by the recording of impacts according to their location, we have aggregated the  
426 impacts at the municipality level. That is to say, all the impacts reported for a given municipality  
427 that were caused by the same event (thus the same day) are recorded under the same line in  
428 the database. This results in 562 "aggregated" impacts instead of 917 impacts initially. From  
429 these data, we have redrawn Figure 3 (Figure A2) comparing the moving average of impacts  
430 and associated events. We can see that the trends are significantly the same. There is an  
431 increase of impacts (here starting soon as 1890s) and a late increase of events (1990s). Thus,  
432 the way the impacts are stored in the database (by location or by municipality) does not affect  
433 the observed temporal changes in impacts.

434  
435 Changes in exposure and vulnerability related to land use is another potential  
436 explanation of the rise in the number of impacts (Magnan et al., 2012; Garnier and Desarthe,  
437 2013; Camuffo et al., 2020). A major population growth happened, especially in Bonneville and  
438 Chamonix, leading to a strong and fast urban sprawl in the flood plain between the 1950's and  
439 the 2010's as shown by aerial photographs (Figure 6). They also show the vanishing of the  
440 alluvial forest (Dufour and Piégay, 2006) and cultivated fields to the benefit of urbanization in  
441 both towns. The population growth in the Arve Valley varies according to the towns. Upstream,  
442 in Chamonix, the demographic expansion dates back to the early 20<sup>th</sup> century with the flourish  
443 of mountain tourism. In downstream towns – e.g. Bonneville and Annemasse – the expansion  
444 starts in the 1950's because of the economic attractiveness of Geneva.

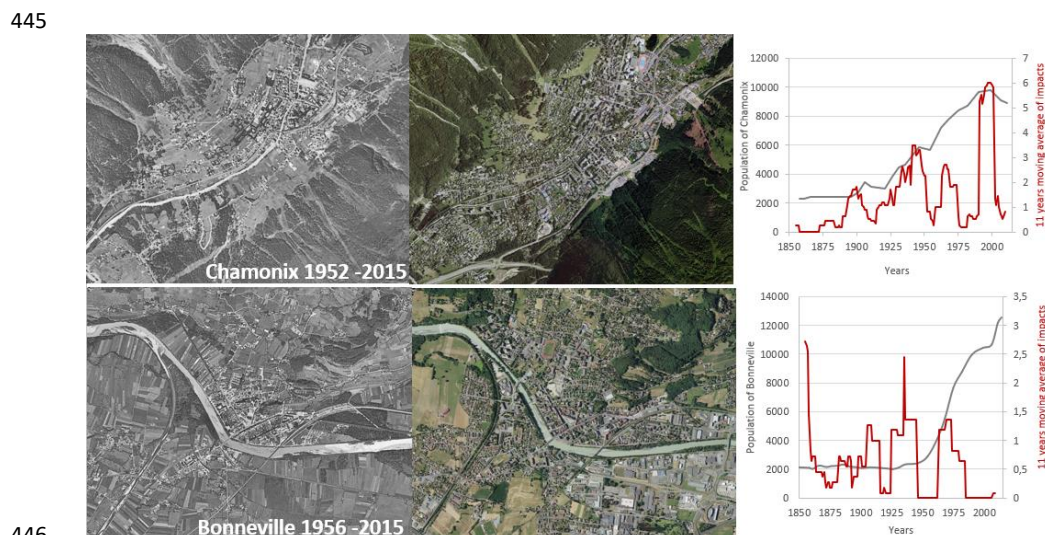

446 Figure 6. Land use evolution and expansion demographic associated with impacts of  
447 Chamonix and Bonneville from 1848 to 2011 (© IGN).

449  
450 Besides these numbers, the urban expansion and the growth in tourism come with the arrival  
451 of new residents in the valley (Haute-Savoie : la plus forte croissance démographique de





452 métropole, 2020), unaware of the local hazard history. The valley narrowness, the demand for  
453 land and the loss of memory of past events have led to build in historical flood-prone area,  
454 resulting in an increased exposure. For instance, in 1944 recently built houses in Chamonix  
455 were washed away by the Grépon River. The same situation also happened during the 1968  
456 flood that destroyed a new residential area in Bonneville. In Chamonix, the number of impacts  
457 punctually increase from year to year, somehow mirroring the population growth (Figure 6).  
458 Increasing exposure due to population growth and urbanization may then explain the  
459 increasing number of impacts. One can, however, notice the decrease in impacts after the  
460 disastrous 1996 flood event. This is due to the heightening of the dikes after the 1996 flood. In  
461 Bonneville, the link between the number of impacts and the population growth is not clear.

462  
463  
464

#### 4.4. Nature of the flood impacts.

465 The quantitative analysis of text content reveals the distribution of the impact categories  
466 by river and illustrates the diversity of the catchment in terms of land use and economic  
467 development (Figure 7). This analysis of text content is particularly relevant because it allows  
468 to overcome the database scarcity of quantitative information on the severity of the flood.  
469 Indeed, it is difficult to estimate the severity of the flood event as the flow rate and the water  
470 height are only ~~exceptionally~~ mentioned. However, a link can be made between the impact  
471 nature and the severity of the event (Barriendos et al., 2019).  
472 The number of occurrences of the words determining the category is here named as the  
473 number of mentions. For the overall Arve catchment, damage to the transport network is the  
474 most frequent (406 mentions), followed by damage to urbanized areas (286) and natural  
475 environment (253). Impacts on transport network are in proportion equally distributed among  
476 river types (all around 30%). Impacts on industrial facilities are mainly caused by the Arve  
477 and the Giffre Rivers as their wider valleys allow the installation of these facilities. The Giffre  
478 and the Borne Rivers have caused the least impacts specifically on urban areas, probably  
479 because of less dense population and of an economy based on farming and tourism activities.



480

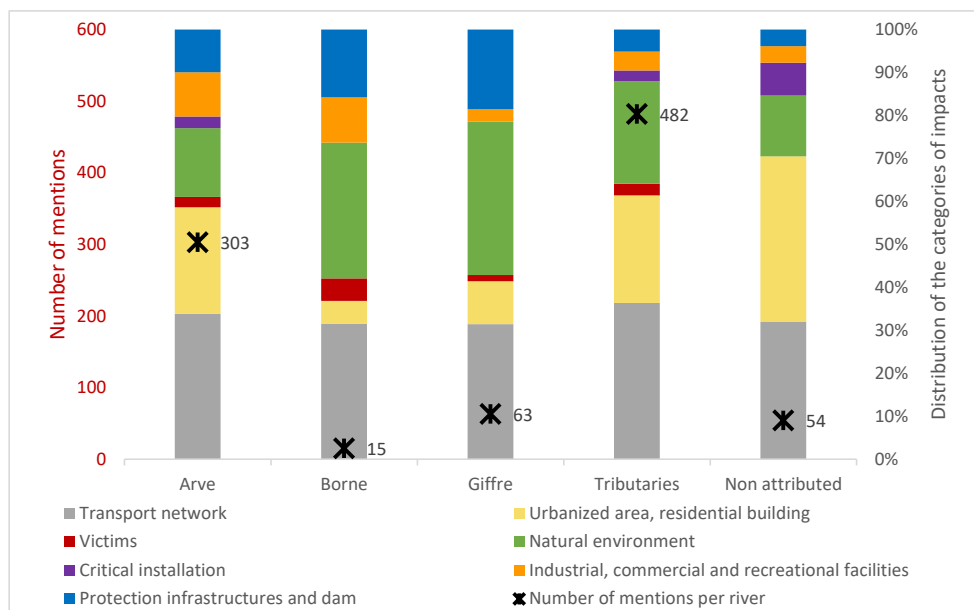

481

482 **Figure 7. Distribution of flood impacts according to the river types. The class “non attributed”**  
 483 **correspond to all impact with no assigned river (e.g. overland flows).**

484

485 Most of the mentions of victims refer to impacts caused by tributaries (20 out of 28). They have  
 486 caused 80% of the deadly impacts registered since 1850 in the whole catchment, e.g. the 1892  
 487 glacial lake outburst and the 1987 flood of Grand-Bornand. The mentions of victims of the  
 488 Borne River should belong to the small tributaries class as the impacts occurred in the  
 489 uppermost part of the catchment. This high mortality may be due to sudden and strong floods  
 490 and to less developed infrastructure of flood protection on the tributaries.

491

492 To track potential changes in the nature of impacts since 1850, they are scrutinized by  
 493 decades over the last 165 years (Figure 8). Impacts on transportation networks are present in  
 494 every decade since 1850 but they increase after 1930 as well as impacts on urbanized area  
 495 and natural environment categories. It was not until 1960 that impacts on the industrial,  
 496 commercial and recreational facilities category increased. Mentions about critical installation  
 497 (sewers and water pipes) are recorded for the first time in the 1960’s. Mentions of victims are  
 498 present in almost every decade. Two decades (1950 and 1970) stand out in terms of category’s  
 499 distribution.

500 Nevertheless, no major evolution of the impacts categories can be seen, except the  
 501 emergence of mentions of critical installations in the 1930’s. The categories used for the  
 502 analyze have been inspired by a recent paper from Diakakis (2020) but in order to deepen our  
 503 analysis of the historical evolution of the impacts’ nature ~~some other and more~~ precise  
 504 classifications should be tested in the future as well as the evolution of the assigned words.

505



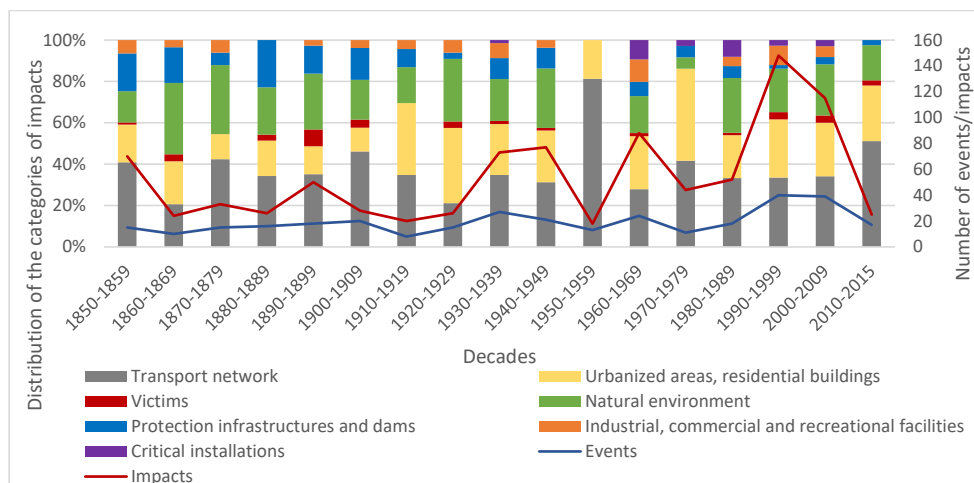

506

507 **Figure 8. Decennial histogram of the evolution of the categories of impacts divided by the**  
508 **number of events.**

509

510 **This analysis of proportions, however, hinders changes in absolute values.** For instance, at  
511 the catchment scale there is a slight increase in the number of mentions of the victims category  
512 since 1980 (16 out of 28) (Figure 8). This increase is not easily noticeable when looking at  
513 proportions of impacts categories because of the strong augmentation in the total number of  
514 mentions since 1930. Yet, apart from the disaster in the Grand-Bornand in 1987, since 1931  
515 all the mentions of victims refer to evacuations, recues or injuries.

516 The number of impacts has been almost multiplied by two since 1920. Hence, the mentions of  
517 impacts on natural environment for the period 1850-1930 were multiplied by more than two  
518 compared to the period 1960-2015. During the first period, mentions of impacts on natural  
519 environment refer mainly to forest, field and crops, while after 1960 there is no mention of field  
520 or crops and most of the mentions are about gullying, deposition of sediments and banks. This  
521 is in agreement with the evolution of the land use due to the demographic growth, i.e. the  
522 observed vanishing of forest areas and cultivated land to the benefit of urbanization (Figure 6).  
523 Yet, mentions of impacts on urbanized areas during 1960-2015 has been multiplied almost by  
524 four compared to the 1850-1930 period. ~~This agrees with observed changes in land use~~  
525 ~~characterized by urban sprawl.~~

526

## 527 **5. Conclusions.**

528 We collected historical information from 1850 onwards to document flood impacts in  
529 the Arve valley, an Alpine catchment characterized by a high hydrological and socioeconomic  
530 diversity. The analysis of the HIFAVa database ~~led to acknowledge the rise in the number of~~  
531 ~~impacts starting in 1920 and well-marked from 1960.~~ This rise does not seem to be related to  
532 **increased flood hazard since it does not follow changes in flood occurrence,** except partially  
533 for the latest period (1990-2015). Instead, more frequent impact could be explained by  
534 increased exposure related to the demographic growth (tourism and economic attractiveness  
535 of Geneva) and/or by the evolution of the sources, in particular the emergence of the RTM.

536 There are two main types of flood events causing impacts in the catchment, e.g. floods related  
537 to the main river and those related to the smaller mountain streams. Floods from these small  
538 streams are characterized by sudden and fast hydrological responses and **large** sediment  
539 transport, making hazard management difficult. They caused two third of the 916 recorded  
540 impacts with numerous casualties and gathered impacts, such as the 1892 Bon Nant and the

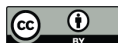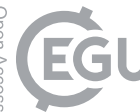

541 1987 Borne rivers floods. In contrast, slow rising floods of the Arve River last in general several  
542 days, affect a large area and trigger mainly economics consequences and no casualties. The  
543 1968 flood affecting a large part of the Arve catchment is an exemplary case of this flood type.  
544 The analysis of the nature of the impacts does not reveal a clear evolution over the last 165  
545 years. However, further work is required to define more detailed categories allowing to  
546 question the evolution of the assigned words since 1850. Additional investigations of the  
547 municipal archives and interviews of local flood risk managers should also be undertaken to  
548 allow answering some key questions, such as the definition of high-impacts events in this very  
549 valley. The processes of risk memory transmission and the evolution of the local political risk  
550 management will be queried for the purpose of understanding the evolution of the social  
551 vulnerability. The following study of this database aim to better understand how hazard,  
552 exposure and vulnerability combines to trigger high impacts events across the recent history  
553 of the Arve catchment.  
554  
555  
556



557 **Appendixes**

558

559 Table A1. List of the historical records – or their origin – used to provide information about flood events  
 560 and impacts collected in the HIFAVa database. The date mentions the year of publication for books  
 561 and period covered by the newspapers.

| Manuscript materials | Printed materials | Newspapers                        | Other records    |
|----------------------|-------------------|-----------------------------------|------------------|
| ADHS                 | AM Cluses         | ADHS                              | BDHI             |
| AM Bonneville        | Conard 1931       | Le Messager (1965-1968)           | RTM (movie 1990) |
| AM Chamonix          | Douvinet 2011     | Le Dauphiné libéré (1963-2014)    | SM3A             |
| AM Cluses            | Goy 2002          | Journal de Genève (1855-1978)     |                  |
|                      | Mestrallet 1986   | La Croix 74 (1898)                |                  |
|                      | Mougin 1914       | L'Allobroge (1903-1940)           |                  |
|                      | Parde 1931        | Le Faucigny (1968)                |                  |
|                      | Payot 1951        | Le Figaro (1924)                  |                  |
|                      | PPR               | Le Messager (1940)                |                  |
|                      | PPRI              | Le Mont-Blanc républicain (1903)  |                  |
|                      | Rannaud 1916      | Le Progrès (1898)                 |                  |
|                      | Rougier           | L'Industriel Savoisien (1910)     |                  |
|                      | RTM               | La Revue Savoissienne (1887-1889) |                  |

562

563

564

565 Table A2. Presentation of the HIFAVa database showing its structure with each data entry.

| id           | [PK] serial | Primary key. ID number of an impact.                                                                                                                                                                                                                                |
|--------------|-------------|---------------------------------------------------------------------------------------------------------------------------------------------------------------------------------------------------------------------------------------------------------------------|
| event        | integer     | Number of the event that triggers the impact. In case of an hydro-meteorological event, several impacts located at different places on different river are associated to the same event.                                                                            |
| sources      | integer     | The different sources that provide information.                                                                                                                                                                                                                     |
| start_day    | integer     | Start day of event.                                                                                                                                                                                                                                                 |
| start_mont   | integer     | Start month of event.                                                                                                                                                                                                                                               |
| start_year   | integer     | Start year of event.                                                                                                                                                                                                                                                |
| start_date   | date        | Start date of event.                                                                                                                                                                                                                                                |
| hour         | text        | Start hour of event.                                                                                                                                                                                                                                                |
| time_unc     | text        | Uncertainty of the start date. H means that the start date is known at the hour scale, D at the day scale, M at the month scale and Y at the year scale. By default, when the day and/or the month is not known, "1" is attributed to start_day and/or start_month. |
| duration     | real        | Duration of event                                                                                                                                                                                                                                                   |
| river        | text        | River that trigger the flood (the cell may be empty if the impacts are not related to river flooding).                                                                                                                                                              |
| impact       | text        | Nature of impact.                                                                                                                                                                                                                                                   |
| municipality | text        | Municipality where the impact is located.                                                                                                                                                                                                                           |
| imp_lat      | real        | Latitude of the impact in decimal degrees.                                                                                                                                                                                                                          |



|                     |         |                                                                                                                                                                                                                                |
|---------------------|---------|--------------------------------------------------------------------------------------------------------------------------------------------------------------------------------------------------------------------------------|
| imp_long            | real    | Longitude of the impact in decimal degrees.                                                                                                                                                                                    |
| Space_unc           |         | Describe the spatial scale of impact location. A means that the impact is located at the scale of a point on a map, B at the scale of a part of a city, C at the scale of a city, D at a coarser scale than the one of a city. |
| count               | integer | Number of victims                                                                                                                                                                                                              |
| hydrometeo_descript | text    | Description of the hydrometeorological event according to the sources.                                                                                                                                                         |
| precipitation       | real    | Precipitation rate given in the sources (mm).                                                                                                                                                                                  |
| flood_descript      | text    | Description of the flood from the sources                                                                                                                                                                                      |
| river_water_level   | real    | Water level of the river (m).                                                                                                                                                                                                  |
| water_level         | real    | Water level of flooded area (m).                                                                                                                                                                                               |
| discharge           | real    | Discharge of the river (m3/s)                                                                                                                                                                                                  |
| impact_descript     | text    | Description of the impacts according to the sources.                                                                                                                                                                           |

566  
 567

568 Figure A1. The wiped-out thermal bath of Saint-Gervais after the debris flow of the 12th of July 1892  
 569 (Thermes de Saint-Gervais Mont-Blanc, 2021).

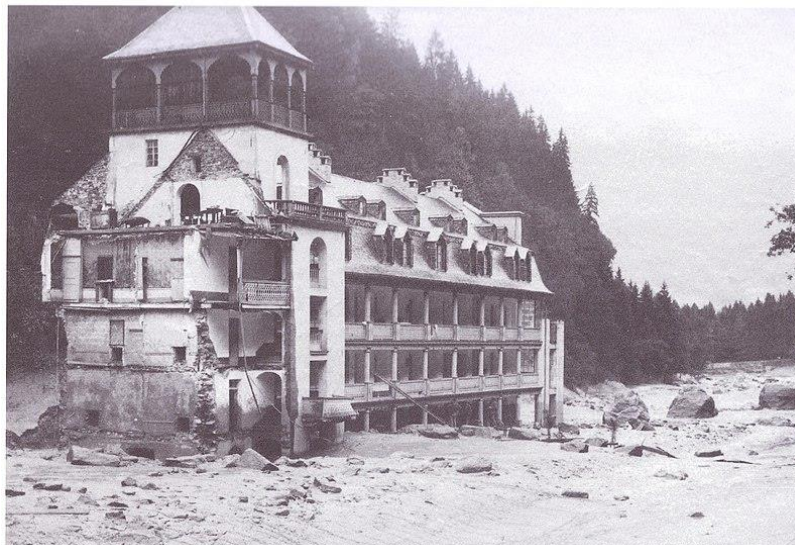

570  
 571  
 572  
 573  
 574

Figure A2. Occurrence of impacts and moving averages of impacted municipalities and associated flood events (one line = one municipality impacted by a flood event).

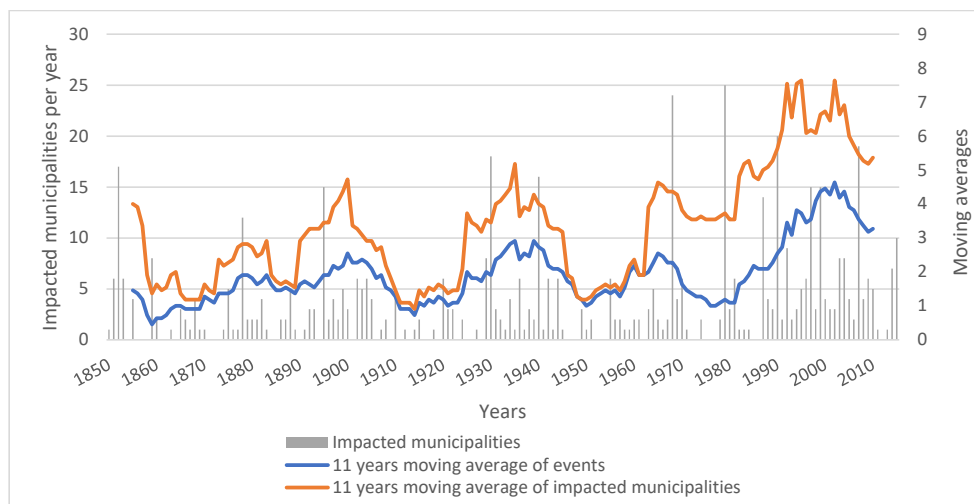

575  
576  
577  
578  
579  
580  
581  
582  
583  
584  
585  
586  
587  
588

Acknowledgments: We would like to thank the *Syndicat Mixte d'Aménagement de l'Arve et de ses Affluents* who shared its database of events and impacts. The HIFAVa database was partly fed thanks to the funding of the projects Labex ITEM CrHistAI and OSUG2020 RHAAP. This study was developed in the framework of *CDP-Trajectories* of the Grenoble-Alpes University (France) funded by the *Agence Nationale de la Recherche* through the project "*Investissements d'avenir*" (ANR-15-IDEX-02).



589 **Bibliography:**

590

591 Antoine, J.-M.: Vulnérabilité et adaptation des sociétés montagnardes à la torrencialité au cours du  
592 Petit Âge Glaciaire dans les Pyrénées, *soe*, 53–66, <https://doi.org/10.4000/soe.685>, 2011.

593 Barriendos, M., Coeur, D., Lang, M., Llasat, M. C., Naulet, R., Lemaitre, F., and Barrera, A.: Stationarity  
594 analysis of historical flood series in France and Spain (14th–20th centuries), *Nat. Hazards Earth Syst.*  
595 *Sci.*, 3, 583–592, <https://doi.org/10.5194/nhess-3-583-2003>, 2003.

596 Barriendos, M., Ruiz-Bellet, J. L., Tuset, J., Mazón, J., Balasch, J. C., Pino, D., and Ayala, J. L.: The  
597 “Prediflood” database of historical floods in Catalonia (NE Iberian Peninsula) AD 1035–2013, and its  
598 potential applications in flood analysis, *Hydrol. Earth Syst. Sci.*, 18, 4807–4823,  
599 <https://doi.org/10.5194/hess-18-4807-2014>, 2014.

600 Barriendos, M., Gil-Guirado, S., Pino, D., Tuset, J., Pérez-Morales, A., Alberola, A., Costa, J., Balasch, J.  
601 C., Castelltort, X., Mazón, J., and Ruiz-Bellet, J. L.: Climatic and social factors behind the Spanish  
602 Mediterranean flood event chronologies from documentary sources (14th–20th centuries), *Global and*  
603 *Planetary Change*, 182, 102997, <https://doi.org/10.1016/j.gloplacha.2019.102997>, 2019.

604 Beck, U.: *Risk Society : Towards a New Modernity*, Sage., London, 1992.

605 Bernard, C.: *Restauration et conservation des terrains en montagne : les terrains et les paysages*  
606 *torrentiels (Haute-Savoie)*, Impr. nationale (Paris), 60 pp., 1900.

607 Blöschl, G., Kiss, A., Viglione, A., Barriendos, M., Böhm, O., Brázdil, R., Coeur, D., Demarée, G., Llasat,  
608 M. C., Macdonald, N., Retsö, D., Roald, L., Schmocker-Fackel, P., Amorim, I., Bělinová, M., Benito, G.,  
609 Bertolin, C., Camuffo, D., Cornel, D., Doktor, R., Elleder, L., Enzi, S., Garcia, J. C., Glaser, R., Hall, J.,  
610 Haslinger, K., Hofstätter, M., Komma, J., Limanówka, D., Lun, D., Panin, A., Parajka, J., Petrić, H.,  
611 Rodrigo, F. S., Rohr, C., Schönbein, J., Schulte, L., Silva, L. P., Toonen, W. H. J., Valent, P., Waser, J., and  
612 Wetter, O.: Current European flood-rich period exceptional compared with past 500 years, *Nature*,  
613 583, 560–566, <https://doi.org/10.1038/s41586-020-2478-3>, 2020.

614 Boudou, M.: *Approche multidisciplinaire pour la caractérisation d’inondations remarquables :*  
615 *enseignements tirés de neuf évènements en France (1910–2010)*, *Geography*, Université Paul Valéry -  
616 Montpellier I, Lyon, 462 pp., 2015.

617 Boudou, M., Denis, C., Michel, L., and Freddy, V.: Grille de lecture pour la caractérisation d’évènements  
618 remarquables d’inondations en France: Exemple d’application pour la crue de mars 1930 dans le bassin  
619 de la Garonne et du Tarn, 22, 2015.

620 Camuffo, D., della Valle, A., and Becherini, F.: A critical analysis of the definitions of climate and  
621 hydrological extreme events, *Quaternary International*, 538, 5–13,  
622 <https://doi.org/10.1016/j.quaint.2018.10.008>, 2020.

623 Conseil départemental de la Haute-Savoie: *Archives départementales de Haute-Savoie*, n.d.

624 Cutter, S. L.: The Vulnerability of Science and the Science of Vulnerability, *Annals of the Association of*  
625 *American Geographers*, 93, 1–12, <https://doi.org/10.1111/1467-8306.93101>, 2003.

626 Diakakis, M., Deligiannakis, G., Antoniadis, Z., Melaki, M., Katsetsiadou, N. K., Andreadakis, E., Spyrou,  
627 N. I., and Gogou, M.: Proposal of a Flash Flood Impact Severity Scale for the classification and mapping  
628 of flash flood impacts., 2020.





- 629 Douvinet, J., Defossez, S., Anselme, A., and Denolle, A.-S.: Les maires face aux plans de prévention du  
630 risque inondation (PPRI), 40, 31, <https://doi.org/10.3917/eg.401.0031>, 2011.
- 631 Dufour, S. and Piégay, H.: Forêts riveraines des cours d'eau et ripisylves : spécificités, fonctions et  
632 gestion, *Rev. For. Fr.*, <https://doi.org/10.4267/2042/6704>, 2006.
- 633 Ferenczi, T.: L'invention du journalisme en France, Naissance de la presse moderne à la fin du XIXème  
634 siècle, Payot., Paris, 274 pp., 1996.
- 635 Garambois, S., Legchenko, A., Vincent, C., and Thibert, E.: Ground-penetrating radar and surface  
636 nuclear magnetic resonance monitoring of an englacial water-filled cavity in the polythermal glacier of  
637 Tête Rousse, 81, 2016.
- 638 Garnier, E.: Genève face à la catastrophe 1350-1950. Un retour d'expérience pour une meilleure  
639 résilience urbaine., Slatkine, Genève, Suisse, 195 pp., 2016.
- 640 Garnier, E.: Xynthia, February 2010: Autopsy of a Foreseeable Catastrophe, in: Management of the  
641 Effects of Coastal Storms: Policy, Scientific and Historical Perspectives, Quevauviller, P., 111–148, 2017.
- 642 Garnier, E.: Lessons learned from the past for a better resilience to contemporary risks, 28, 778–794,  
643 2019.
- 644 Garnier, E. and Desarthe, J.: Cyclones and Societies in the Mascarene Islands 17th-20th Centuries,  
645 *AJCC*, 1–13, <https://doi.org/10.4236/ajcc.2013.21001>, 2013.
- 646 Garnier, E., Ciavola, P., Spencer, T., Ferreira, O., Armaroli, C., and Mclvor, A.: Historical analysis of storm  
647 events: Case studies in France, England, Portugal and Italy, 134, 10–23, 2018.
- 648 Gex, F.: La Haute-Savoie aujourd'hui et il y a 100 ans avec un tableau de la population par commune  
649 de 1801 à 1921., Librairie M. Dardel, Chambéry, 1924.
- 650 Giacona, F., Eckert, N., and Martin, B.: A 240-year history of avalanche risk in the Vosges Mountains  
651 based on non-conventional (re)sources, 17, 887–904, <https://doi.org/10.5194/nhess-17-887-2017>,  
652 2017.
- 653 Giacona, F., Martin, B., Furst, B., Glaser, R., Eckert, N., Himmelsbach, I., and Edelblutte, C.: Improving  
654 the understanding of flood risk in the Alsatian region by knowledge capitalization: the ORRION  
655 participative observatory, *Nat. Hazards Earth Syst. Sci.*, 19, 1653–1683, <https://doi.org/10.5194/nhess-19-1653-2019>, 2019.
- 657 Gil-Guirado, S., Espín-Sánchez, J.-A., and Del Rosario Prieto, M.: Can we learn from the past? Four  
658 hundred years of changes in adaptation to floods and droughts. Measuring the vulnerability in two  
659 Hispanic cities, *Climatic Change*, 139, 183–200, <https://doi.org/10.1007/s10584-016-1768-0>, 2016.
- 660 Gil-Guirado, S., Pérez-Morales, A., and Lopez-Martinez, F.: SMC-Flood database: a high-resolution  
661 press database on flood cases for the Spanish Mediterranean coast (1960–2015), *Nat. Hazards Earth  
662 Syst. Sci.*, 19, 1955–1971, <https://doi.org/10.5194/nhess-19-1955-2019>, 2019.
- 663 Giorgi, F., Zsolt Torma, C., Coppola, E., and Ban, N.: Enhanced summer convective rainfall at Alpine high  
664 elevations in response to climate warming, 9, 2016.



- 665 Gobiet, A., Kotlarski, S., Beniston, M., Heinrich, G., Rajczak, J., and Stoffel, M.: 21st century climate  
666 change in the European Alps—A review, *Science of The Total Environment*, 493, 1138–1151,  
667 <https://doi.org/10.1016/j.scitotenv.2013.07.050>, 2014.
- 668 Goy, J.: *Autour de la catastrophe de l'établissement thermal de Saint-Gervais-les-Bains en 1892 :  
669 problèmes d'histoire des catastrophes naturelles., Les pouvoirs publics face aux risques naturels dans  
670 l'histoire., Grenoble, 39–49, 2002.*
- 671 Higuchi, K.: KH Coder, 2015.
- 672 Haute-Savoie : la plus forte croissance démographique de métropole:  
673 <https://www.insee.fr/fr/statistiques/3689656>, last access: 1 August 2020.
- 674 INSEE: *Populations légales communales depuis 1968, 2019.*
- 675 IPCC: *Managing the risks of extreme events and disasters to advance climate change adaptation,  
676 Intergovernmental Panel on Climate Change, 2012.*
- 677 IPCC: *The Ocean and Cryosphere in a Changing Climate, Intergovernmental Panel on Climate Change,  
678 Genève, Suisse, 2019.*
- 679 Lastoria, B., Simonetti, M. R., Casaioli, M., Mariani, S., and Monacelli, G.: *Socio-economic impacts of  
680 major floods in Italy from 1951 to 2003, Adv. Geosci., 7, 223–229, [https://doi.org/10.5194/adgeo-7-  
681 223-2006](https://doi.org/10.5194/adgeo-7-223-2006), 2006.*
- 682 Leone, F. and Vinet, F.: *La vulnérabilité, un concept fondamental au cœur des méthodes d'évaluation  
683 des risques naturels, in: La vulnérabilité des sociétés et des territoires face aux menaces naturelles,  
684 GESTER, 2006.*
- 685 Llasat, M. C., Llasat-Botija, M., and López, L.: *A press database on natural risks and its application in  
686 the study of floods in Northeastern Spain, Nat. Hazards Earth Syst. Sci., 9, 2049–2061,  
687 <https://doi.org/10.5194/nhess-9-2049-2009>, 2009.*
- 688 Llasat, M. C., Llasat-Botija, M., Petrucci, O., Pasqua, A. A., Rosselló, J., Vinet, F., and Boissier, L.: *Towards  
689 a database on societal impact of Mediterranean floods within the framework of the HYMEX project,  
690 Nat. Hazards Earth Syst. Sci., 13, 1337–1350, <https://doi.org/10.5194/nhess-13-1337-2013>, 2013.*
- 691 Llasat, M.-C., Barriandos, M., Barrera, A., and Rigo, T.: *Floods in Catalonia (NE Spain) since the 14th  
692 century. Climatological and meteorological aspects from historical documentary sources and old  
693 instrumental records, Journal of Hydrology, 313, 32–47,  
694 <https://doi.org/10.1016/j.jhydrol.2005.02.004>, 2005.*
- 695 Magnan, A., Duvat, V., and Garnier, E.: *Reconstituer les « trajectoires de vulnérabilité » pour penser  
696 différemment l'adaptation au changement climatique, Nat. Sci. Soc., 20, 82–91,  
697 <https://doi.org/10.1051/nss/2012008>, 2012.*
- 698 Mélo, A., Wilhelm, B., Giguët-Covex, C., and Arnaud, F.: *Construire une chronique d'inondations :  
699 événements hydrologiques et histoire climatique dans le bassin de l'Arve (Alpes du Nord, France) entre  
700 les XVIIIe et XXIe siècles., 40, 411–419, 2015.*
- 701 Ménégos, M., Valla, E., Jourdain, N. C., Blanchet, J., Beaumet, J., Wilhelm, B., Gallée, H., Fettweis, X.,  
702 Morin, S., and Anquetin, S.: *Contrasting seasonal changes in total and intense precipitation in the  
703 European Alps from 1903 to 2010, 1–37, <https://doi.org/10.5194/nhess-2019-690>, 2020.*



- 704 Merz, R. and Blöschl, G.: Regional flood risk—what are the driving processes?, 40–58, 2003.
- 705 Meunier, M.: La catastrophe du Grand Bornand : crue torrentielle du Borne le 14 juillet 1987, 78, 103–  
706 114, 1990.
- 707 Min, S.-K., Zhang, X., Zwiers, F. W., and Hegerl, G. C.: Human contribution to more-intense precipitation  
708 extremes, *Nature*, 470, 378–381, <https://doi.org/10.1038/nature09763>, 2011.
- 709 Ministère de la Transition écologique: Prévention des risques naturels, 2020.
- 710 Ministère de la Transition Ecologique: Base de Données Historiques sur les Inondations, n.d.
- 711 Mougin, P.: Les torrents de la Savoie, Société d'histoire de la Savoie, Grenoble, 1914.
- 712 Papagiannaki, K., Lagouvardos, K., and Kotroni, V.: A database of high-impact weather events in  
713 Greece: a descriptive impact analysis for the period 2001–2011, *Nat. Hazards Earth Syst. Sci.*, 13, 727–  
714 736, <https://doi.org/10.5194/nhess-13-727-2013>, 2013.
- 715 Pardé, M.: Les crues de l'Arve en octobre 1930, *rga*, 19, 495–497,  
716 <https://doi.org/10.3406/rga.1931.4782>, 1931.
- 717 Peiry, J. L. and Bravard, J. P.: Evolution naturelle d'un remplissage sédimentaire intramontagnard et  
718 impacts des aménagements contemporains : L'exemple de la vallée de l'Arve (74), *La Houille Blanche*,  
719 221–225, <https://doi.org/10.1051/lhb/1989018>, 1989.
- 720 Petrucci, O., Aceto, L., Bianchi, C., Bigot, V., Brázdil, R., Pereira, S., Kahraman, A., Kılıç, Ö., Kotroni, V.,  
721 Llasat, M. C., Llasat-Botija, M., Papagiannaki, K., Pasqua, A. A., Řehoř, J., Rossello Geli, J., Salvati, P.,  
722 Vinet, F., and Zêzere, J. L.: Flood Fatalities in Europe, 1980–2018: Variability, Features, and Lessons to  
723 Learn, *Water*, 11, 1682, <https://doi.org/10.3390/w11081682>, 2019.
- 724 Préfecture de la Haute-Savoie: Données communales : plans de prévention des risques naturels  
725 (PPRN), Les services de l'Etat en Haute-Savoie, n.d.
- 726 Rougier, H.: Les inondations du 24 juillet dans la haute vallée de l'Arve : faits et conséquences à tirer  
727 pour l'aménagement du territoire., *Les pouvoirs publics face aux risques naturels dans l'histoire.*,  
728 Grenoble, 51–64, 2001.
- 729 Rousset-Mestrallet, M.: Des torrents et des hommes. Trois siècles d'histoire à Samoëns., *Imprim'off 7*,  
730 Marignier, 150 pp., 1986.
- 731 RTM and ONF: Base de Données RTM, 2012.
- 732 Soanes, C. and Stevenson, A.: Catastrophe, *Concise Oxford English Dictionary*, 11 (revised), 2009.
- 733 Thermes de Saint-Gervais Mont-Blanc: The wiped-out thermal bath of Saint-Gervais after the debris  
734 flow of the 12th of July 1892., [https://www.thermes-saint-gervais.com/wp-](https://www.thermes-saint-gervais.com/wp-content/uploads/2018/07/STGMB-7.jpg)  
735 [content/uploads/2018/07/STGMB-7.jpg](https://www.thermes-saint-gervais.com/wp-content/uploads/2018/07/STGMB-7.jpg), 30 March 2021.
- 736 Thoumas, P.: Histoire des crues du Roubion (Drôme, France) depuis 1501 AD, une approche  
737 hydrologique des fluctuations climatiques sur cinq siècles, *physio-geo*, 14, 87–111,  
738 <https://doi.org/10.4000/physio-geo.8984>, 2019.



- 739 Viani, A., Condom, T., Sicart, J.-E., Rabatel, A., Gascoin, S., Ranzi, R., and Wimez, M.: Impact of the  
740 glacier retreat and snow melt on the seasonal cycle of streamflow of the Arve catchment since the  
741 1960s (Northern French Alps), EGU General Assembly, Vienna, Austria, 1, 2018.
- 742 Wetter, O.: The potential of historical hydrology in Switzerland, *Hydrol. Earth Syst. Sci.*, 21, 5781–5803,  
743 <https://doi.org/10.5194/hess-21-5781-2017>, 2017.
- 744 Wilhelm, B., Ballesteros Canovas, J. A., Macdonald, N., Toonen, W., Baker, V., Barriendos, M., Benito,  
745 G., Brauer, A., Corella, J. P., Denniston, R., Glaser, R., Ionita, M., Kahle, M., Liu, T., Luetscher, M.,  
746 Macklin, M., Mudelsee, M., Munoz, S., Schulte, L., St. George, S., Stoffel, M., and Wetter, O.:  
747 Interpreting historical, botanical, and geological evidence to aid preparations for future floods, 6,  
748 <https://doi.org/10.1002/wat2.1318>, 2019.

749
